# Supplementary material for: Estimating Savings Opportunities From Therapeutic Substitutions of High-Cost Generic Medications
Source: PubMed Central journal article supplement — JAMA Netw Open. 2022 Nov 2;5(11):e2239868. doi: 10.1001/jamanetworkopen.2022.39868 (PMC9631106; doi:10.1001/jamanetworkopen.2022.39868), 2022-11-02
Supplement: jamanetwopen-e2239868-s001.pdf [file jamanetwopen-e2239868-s001.pdf]

## Supplemental Online Content

Socal MP, Cordeiro T, Anderson GF, Bai G. Estimating savings opportunities from therapeutic substitutions of high-cost generic medications. *JAMA Netw Open*. 2022;5(11):e2239868. doi:10.1001/jamanetworkopen.2022.39868

**eTable.** Study Sample: High Cost Generics, Therapeutic Classes, and Therapeutic Alternatives

**eFigure 1.** Distribution of Drug Discounts Across the 45 Drug Pairs in the Study Sample

**eFigure 2.** Association Between Total Spending and Total Savings Levels Across the 45 Drug Pairs in the Study Sample

This supplemental material has been provided by the authors to give readers additional information about their work.

**eTable. Study Sample: High Cost Generics, Therapeutic Classes, and Therapeutic Alternatives**

| High-Cost Generic                                           | Therapeutic Class                                                                 | Therapeutic Alternatives                             |
|-------------------------------------------------------------|-----------------------------------------------------------------------------------|------------------------------------------------------|
| <b>Substitution: same drug, different manufacturer</b>      |                                                                                   |                                                      |
| Anucort-HC 25mg Suppository                                 | Antihemorrhoidal Agent; Corticosteroid, Rectal                                    | Hydrocortisone Acetate suppository 25mg              |
| Anucort-HC 25mg Suppository                                 | Antihemorrhoidal Agent; Corticosteroid, Rectal                                    | Hydrocortisone Acetate suppository 25mg              |
| <b>Substitution: same drug, different strength</b>          |                                                                                   |                                                      |
| Bupropion HCl ER (XL) 450mg Extended release 24 hour tablet | Antidepressant, Dopamine/Norepinephrine-Reuptake Inhibitor, smoking cessation aid | Bupropion XL Extended release 24 hour tablet 150mg   |
| Butalbital-APAP-Caffeine 50mg-300mg-40mg Capsule            | Analgesic, Nonopioid; Barbiturate                                                 | Butalbital-APAP-caffeine tablet 50mg-325mg-40mg      |
| Butalbital-APAP-Caffeine 50mg-300mg-40mg Capsule            | Analgesic, Nonopioid; Barbiturate                                                 | Butalbital-APAP-caffeine tablet 50mg-325mg-40mg      |
| Chlorzoxazone 250mg Tablet                                  | Skeletal Muscle Relaxant                                                          | Chlorzoxazone tablet 500mg                           |
| Clindamycin Phosphate-Benzoyl Peroxide 1%-5% Gel            | Antibiotic, Lincosamide; Topical Skin Product, Acne                               | Clindamycin Phosphate-Benzoyl Peroxide gel 1.2mg-5mg |
| Clindamycin Phosphate-Benzoyl Peroxide 1%-5% Gel            | Antibiotic, Lincosamide; Topical Skin Product, Acne                               | Clindamycin Phosphate-Benzoyl Peroxide gel 1.2mg-5mg |
| Clindamycin Phosphate-Benzoyl Peroxide 1%-5% Gel            | Antibiotic, Lincosamide; Topical Skin Product, Acne                               | Clindamycin Phosphate-Benzoyl                        |

|                                                          |                                                             |                                                                          |
|----------------------------------------------------------|-------------------------------------------------------------|--------------------------------------------------------------------------|
|                                                          |                                                             | Peroxide gel 1.2mg-5mg                                                   |
| Fenofibrate 120mg Tablet                                 | Antilipemic Agent, Fibric Acid                              | Fenofibrate tablet 145mg                                                 |
| Fluorouracil 0.5mg Cream                                 | Antineoplastic Agent, Antimetabolite (Pyrimidine Analog)    | Fluorouracil cream 5%                                                    |
| Mesalamine 800mg Delayed release tablet                  | 5-Aminosalicylic Acid Derivative                            | Mesalamine delayed-release tablet 1.2g                                   |
| Prena1 Pearl 30mg-1.4mg-200mg Controlled release capsule | Prenatal multivitamins                                      | Prenatal Multivitamin + DHA controlled release capsules 28mg-0.8mg-200mg |
| <b>Substitution: same drug, different dosage form</b>    |                                                             |                                                                          |
| Zolpidem Tartrate ER 12.5mg Extended release tablet      | Hypnotic, Miscellaneous                                     | Zolpidem Tartrate tablet 10                                              |
| Zolpidem Tartrate ER 12.5mg Extended release tablet      | Hypnotic, Miscellaneous                                     | Zolpidem Tartrate tablet 10                                              |
| Venlafaxine HCl ER 225mg Extended release 24 hour tablet | Antidepressant, Serotonin/Norepinephrine Reuptake Inhibitor | Venlafaxine HCl ER 75mg Extended release 24 hour capsule                 |
| Venlafaxine HCl ER 225mg Extended release 24 hour tablet | Antidepressant, Serotonin/Norepinephrine Reuptake Inhibitor | Venlafaxine HCl ER 75mg Extended release 24 hour capsule                 |
| Venlafaxine HCl ER 225mg Extended release 24 hour tablet | Antidepressant, Serotonin/Norepinephrine Reuptake Inhibitor | Venlafaxine HCl ER 75mg Extended release 24 hour capsule                 |
| Venlafaxine HCl ER 225mg Extended release 24 hour tablet | Antidepressant, Serotonin/Norepinephrine Reuptake Inhibitor | Venlafaxine HCl ER 75mg Extended release 24 hour capsule                 |

|                                                                                             |                                                                         |                                                                   |
|---------------------------------------------------------------------------------------------|-------------------------------------------------------------------------|-------------------------------------------------------------------|
| Venlafaxine HCl ER 75mg<br>Extended release 24 hour<br>tablet                               | Antidepressant,<br>Serotonin/Norepinephrine<br>Reuptake Inhibitor       | Venlafaxine HCl ER<br>75mg Extended<br>release 24 hour<br>capsule |
| Norethindrone acetate-<br>Ethinyl estradiol-Ferrous<br>fumarate 1mg-20mg<br>Chewable tablet | Contraceptive; Estrogen and<br>Progestin Combination                    | Junel FE 1/20 tablet<br>1mg-20mg                                  |
| Norethindrone acetate-<br>Ethinyl estradiol-Ferrous<br>fumarate 1mg-20mg<br>Chewable tablet | Contraceptive; Estrogen and<br>Progestin Combination                    | Junel FE 1/20 tablet<br>1mg-20mg                                  |
| Mupirocin Calcium 2mg<br>Cream                                                              | Antibiotic, Topical                                                     | Mupirocin ointment<br>2mg                                         |
| Metformin HCl ER<br>(Osmotic Release)<br>1000mg Extended<br>release 24 hour tablet          | Antidiabetic Agent, Biguanide                                           | Metformin HCl ER<br>extended release 24<br>hour tablet 500mg      |
| Metformin HCl ER<br>(Osmotic Release)<br>1000mg Extended<br>release 24 hour tablet          | Antidiabetic Agent, Biguanide                                           | Metformin HCl ER<br>extended release 24<br>hour tablet 500mg      |
| Metformin HCl ER<br>(Modified Release)<br>1000mg Extended<br>release 24 hour tablet         | Antidiabetic Agent, Biguanide                                           | Metformin HCl ER<br>extended release 24<br>hour tablet 500mg      |
| Metformin HCl ER<br>(Modified Release)<br>1000mg Extended<br>release 24 hour tablet         | Antidiabetic Agent, Biguanide                                           | Metformin HCl ER<br>extended release 24<br>hour tablet 500mg      |
| Ketorolac Tromethamine<br>15.75mg Spray                                                     | Analgesic, Nonopioid;<br>Nonsteroidal Anti-inflammatory<br>Drug (NSAID) | Ketorolac<br>Tromethamine<br>solution 30mg                        |
| Doxycycline 40mg<br>Capsule                                                                 | Antibiotic, Tetracycline Derivative                                     | Doxycycline Hyclate<br>tablet 20mg                                |
| Doxycycline Hyclate<br>50mg Tablet                                                          | Antibiotic, Tetracycline Derivative                                     | Doxycycline Hyclate<br>tablet 50mg                                |

|                                                                                |                                                                           |                                                                                                                                           |
|--------------------------------------------------------------------------------|---------------------------------------------------------------------------|-------------------------------------------------------------------------------------------------------------------------------------------|
| Doxycycline Hyclate<br>200mg Delayed release<br>tablet                         | Antibiotic, Tetracycline Derivative                                       | Doxycycline Hyclate<br>tablet 100mg,<br>Doxycycline Hyclate<br>capsule 100mg                                                              |
| <b>Substitution: different drug, same therapeutic class</b>                    |                                                                           |                                                                                                                                           |
| Dihydroergotamine<br>Mesylate 4 mg/ml Nasal<br>Solution                        | Antimigraine Agent; Ergot<br>Derivative                                   | Sumatriptan nasal<br>solution<br>5mg/activation                                                                                           |
| Drospirenone-Ethinyl<br>Estradiol-Levomefolate<br>3mg-0.02mg-0.451mg<br>Tablet | Contraceptive; Estrogen and<br>Progestin Combination                      | Drospirenone-Ethinyl<br>Estradiol tablet 3mg-<br>0.02mg                                                                                   |
| Eletriptan Hydrobromide<br>40mg Tablet                                         | Antimigraine Agent; Serotonin 5-<br>HT <sub>1B, 1D</sub> Receptor Agonist | Rizatriptan benzoate<br>tablets 10mg,<br>Naratriptan HCl<br>tablets 2.5mg,<br>Sumatriptan succinate<br>tablets 50mg                       |
| Eletriptan Hydrobromide<br>40mg Tablet                                         | Antimigraine Agent; Serotonin 5-<br>HT <sub>1B, 1D</sub> Receptor Agonist | Rizatriptan benzoate<br>tablets 10mg,<br>Naratriptan HCl<br>tablets 2.5mg,<br>Sumatriptan succinate<br>tablets 50mg                       |
| Esomeprazole<br>Magnesium 40mg<br>Capsule, delayed release                     | Proton Pump inhibitor                                                     | Omeprazole delayed<br>release capsule<br>40mg, Pantoprazole<br>sodium extended<br>release tablet 40mg                                     |
| Fenoprofen Calcium<br>200mg Capsule                                            | Analgesic, Nonopioid;<br>Nonsteroidal Anti-inflammatory<br>Drug (NSAID)   | Diclofenac sodium<br>extended release<br>tablet 50mg,<br>Ibuprofen tablet<br>600mg, Naproxen<br>tablet 500mg,<br>Meloxicam tablet<br>15mg |

|                                        |                                                                       |                                                                                                                             |
|----------------------------------------|-----------------------------------------------------------------------|-----------------------------------------------------------------------------------------------------------------------------|
| Frovatriptan Succinate<br>2.5mg Tablet | Antimigraine Agent; Serotonin 5-HT <sub>1B, 1D</sub> Receptor Agonist | Naratriptan HCl tablet 2.5mg,<br>Rizatriptan benzoate tablet 10mg,<br>Sumatriptan succinate tablet 50mg                     |
| Frovatriptan Succinate<br>2.5mg Tablet | Antimigraine Agent; Serotonin 5-HT <sub>1B, 1D</sub> Receptor Agonist | Naratriptan HCl tablet 2.5mg,<br>Rizatriptan benzoate tablet 10mg,<br>Sumatriptan succinate tablet 50mg                     |
| Frovatriptan Succinate<br>2.5mg Tablet | Antimigraine Agent; Serotonin 5-HT <sub>1B, 1D</sub> Receptor Agonist | Naratriptan HCl tablet 2.5mg,<br>Rizatriptan benzoate tablet 10mg,<br>Sumatriptan succinate tablet 50mg                     |
| Levorphanol Tartrate<br>3mg Tablet     | Analgesic, Opioid                                                     | Methadone HCl tablet 10mg,<br>Morphine sulfate extended release tablet 30mg                                                 |
| Lidocaine-Tetracaine 7%-7% Cream       | Analgesic, Topical; Local Anesthetic                                  | Lidocaine ointment 5%                                                                                                       |
| Metaxalone 800mg Tablet                | Skeletal Muscle Relaxant                                              | Methocarbamol tablet 500mg,<br>Carisoprodol tablet 350mg,<br>Chlorzoxazone tablet 500mg,<br>Cyclobenzaprine HCl tablet 10mg |

|                                                   |                                      |                                         |
|---------------------------------------------------|--------------------------------------|-----------------------------------------|
| Omeprazole-Sodium Bicarbonate 40mg-1100mg Capsule | Proton Pump inhibitor                | Omeprazole delayed release capsule 40mg |
| Tadalafil 20mg Tablet                             | Phosphodiesterase-5 Enzyme Inhibitor | Sildenafil Citrate tablet 100mg         |

Source: Authors' analysis of Colorado All-Payer Claims Database (CO-APCD) 2019 data. The 45 high-cost generics identified in this table, together with their corresponding therapeutic alternatives constituted the study sample.

**eFigure 1. Distribution of Drug Discounts Across the 45 Drug Pairs in the Study Sample**

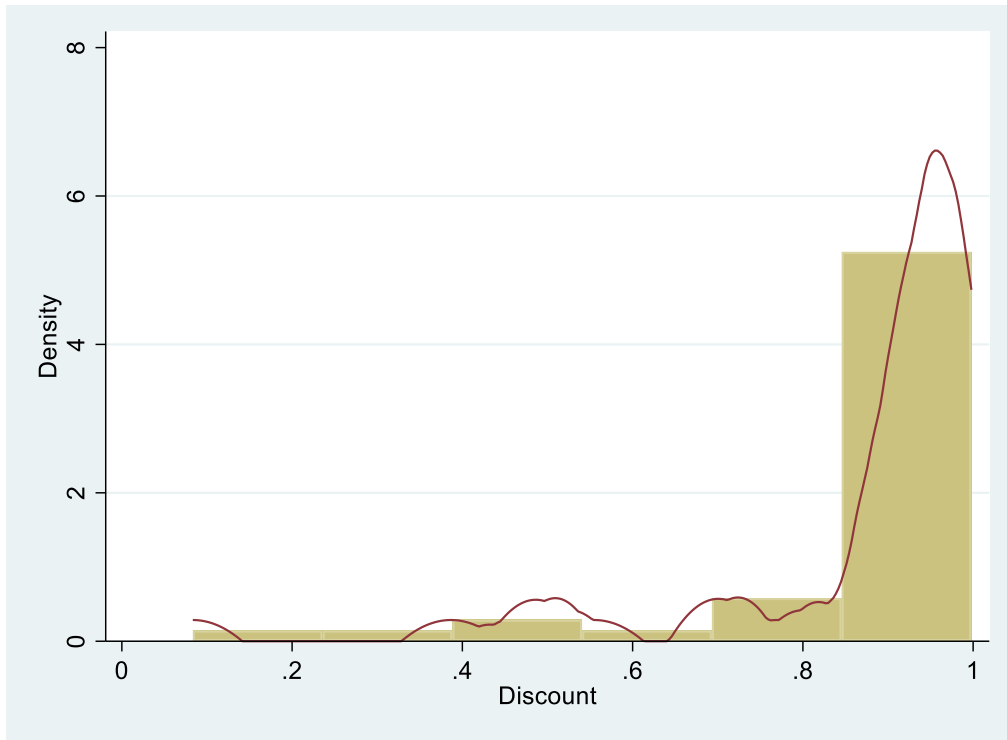

Source: Authors' analysis of Colorado All-Payer Claims Database (CO-APCD) 2019 data. Discounts were calculated as the difference between the price of the high cost generic and the average price of the therapeutic alternative(s) (adjusted for dosage requirements as needed), divided by the price of the high cost generic.



**eFigure 2. Association Between Total Spending and Total Savings Levels Across the 45 Drug Pairs in the Study Sample**

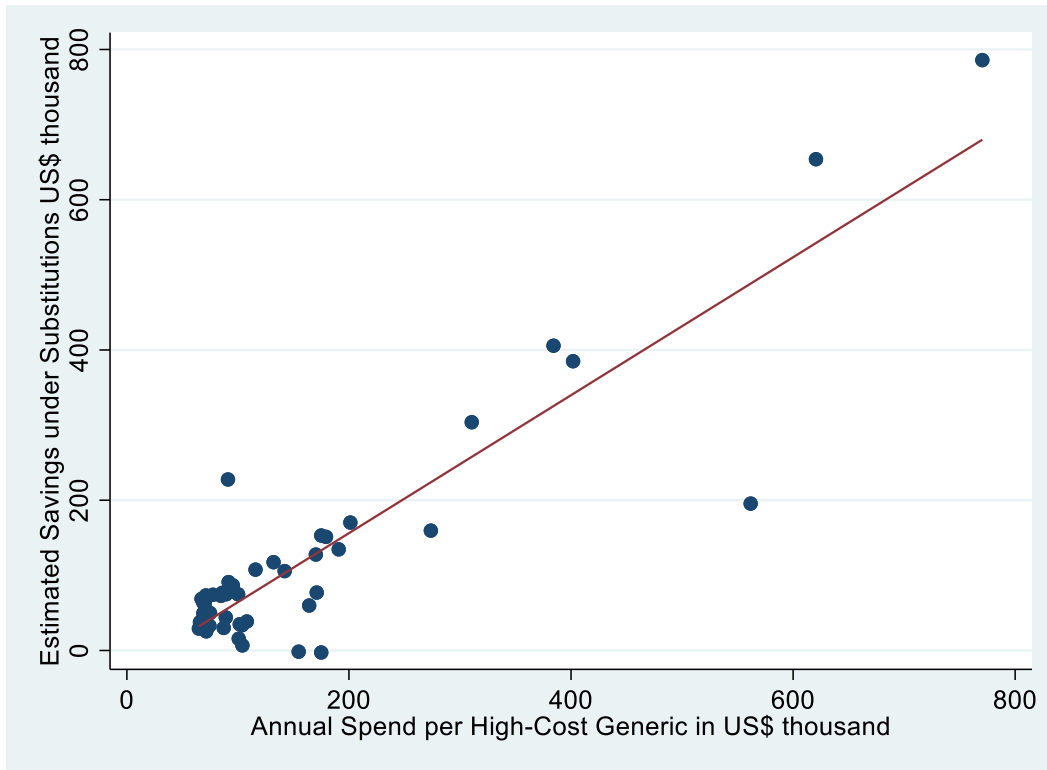

Source: Authors' analysis of Colorado All-Payer Claims Database (CO-APCD) 2019 data. Potential savings were calculated by applying the percentage discount offered by the therapeutic alternatives to the spending on the high-cost generic according to the CO-APCD, assuming that all patients using the high-cost generic would switch to the therapeutic alternative. When multiple therapeutic alternatives were identified for the same drug, we assumed that an equal proportion of people would switch to each alternative.
